# Supplementary figures and images for: Conversion-intercalation competing behaviour of halogen storage on graphite electrode from fluid ZnCl2/ZnBr2 hydrates
Source: Royal Society of Chemistry journal article supplement (doi:10.1039/d3cc04755e), 2023-12-19

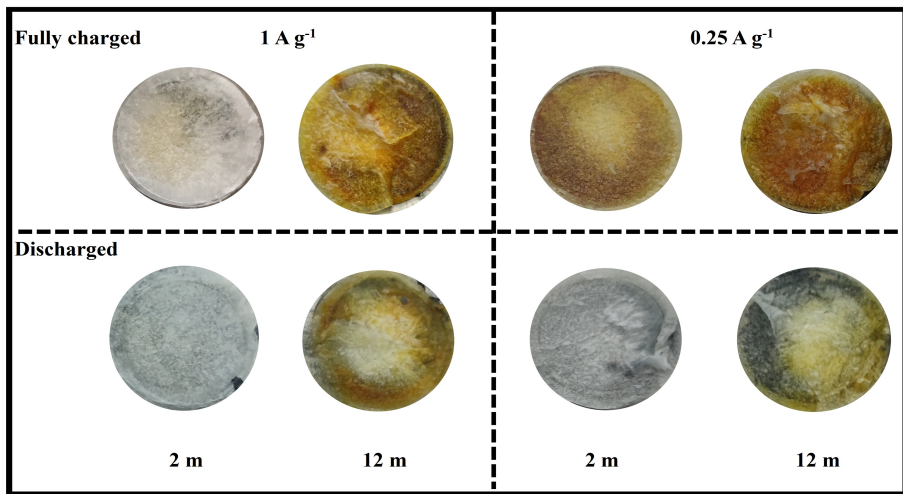

Supplement: d3cc04755e2.pdf [file d3cc04755e2.pdf]

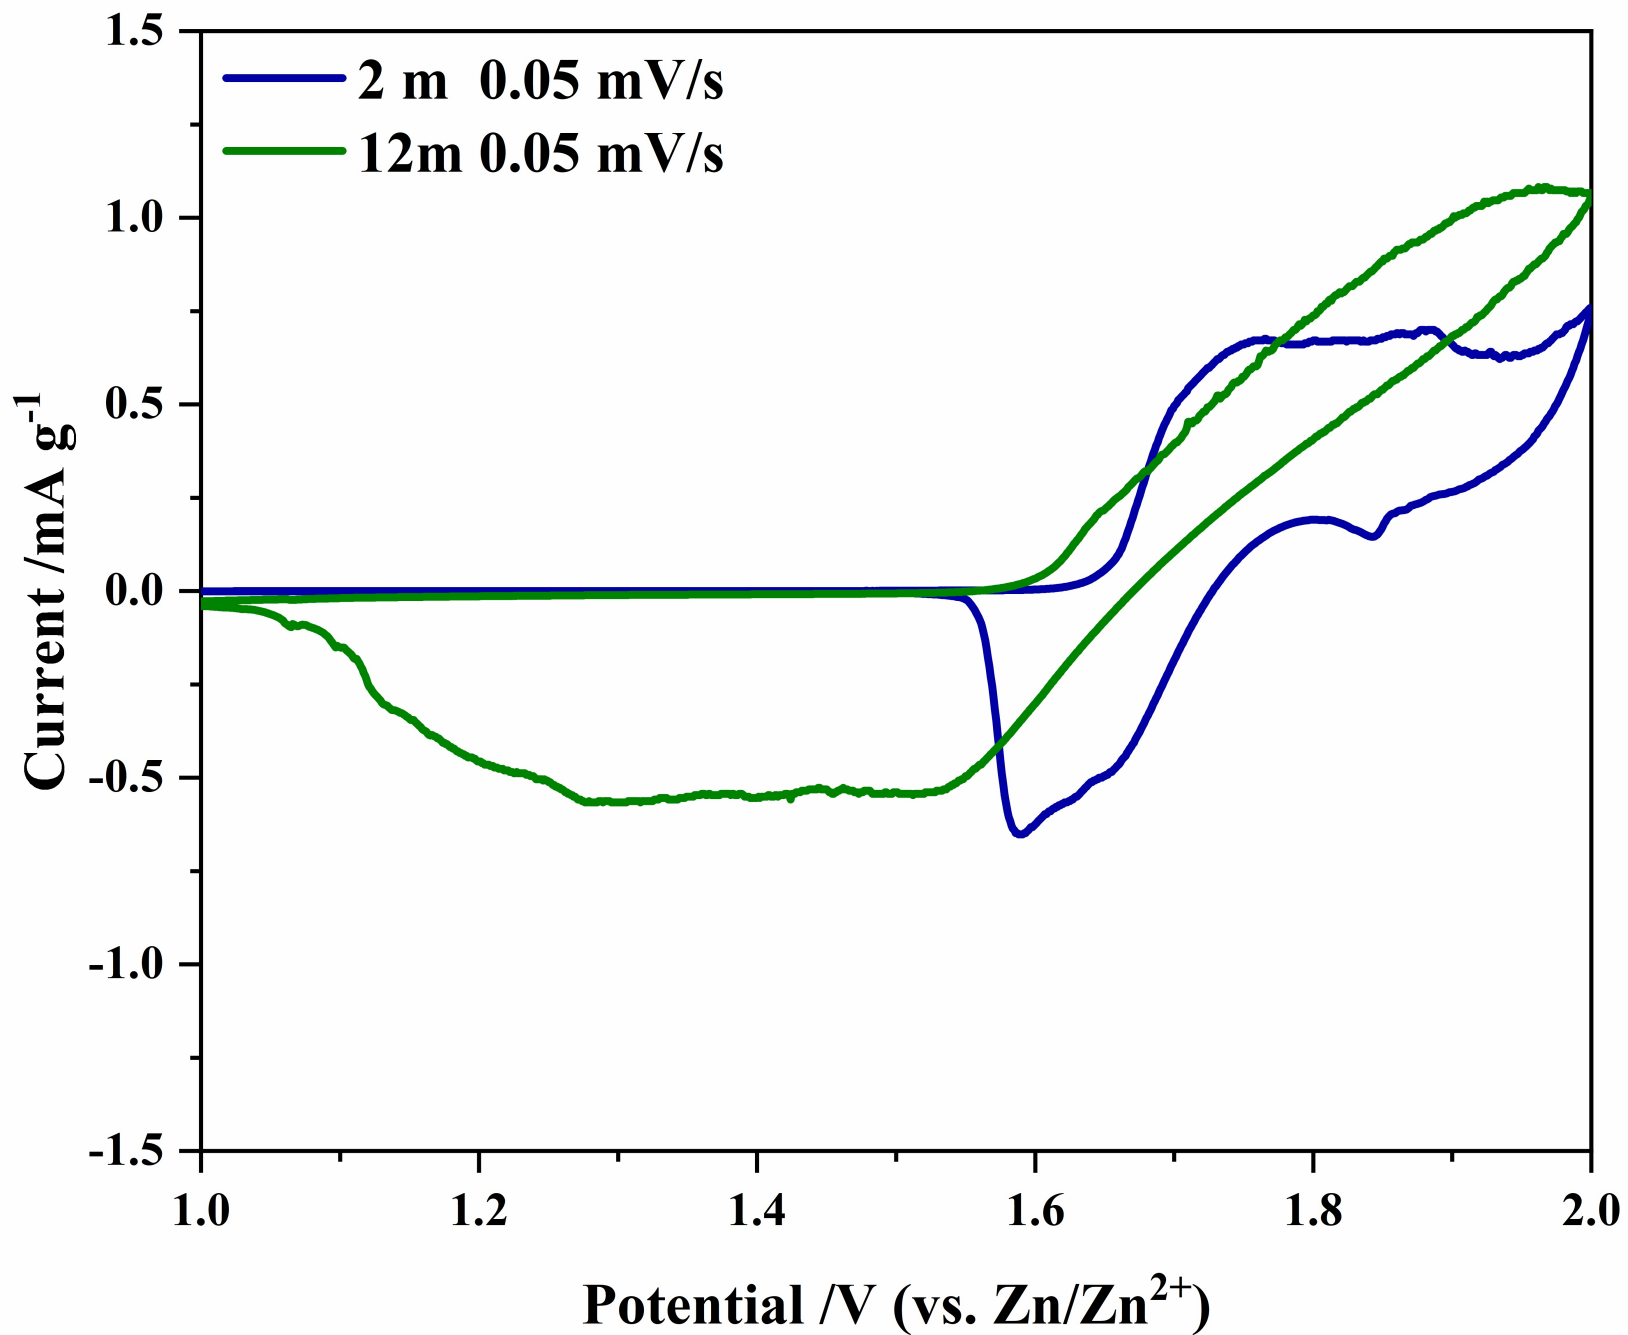

Supplement: d3cc04755e3.pdf [file d3cc04755e3.pdf]

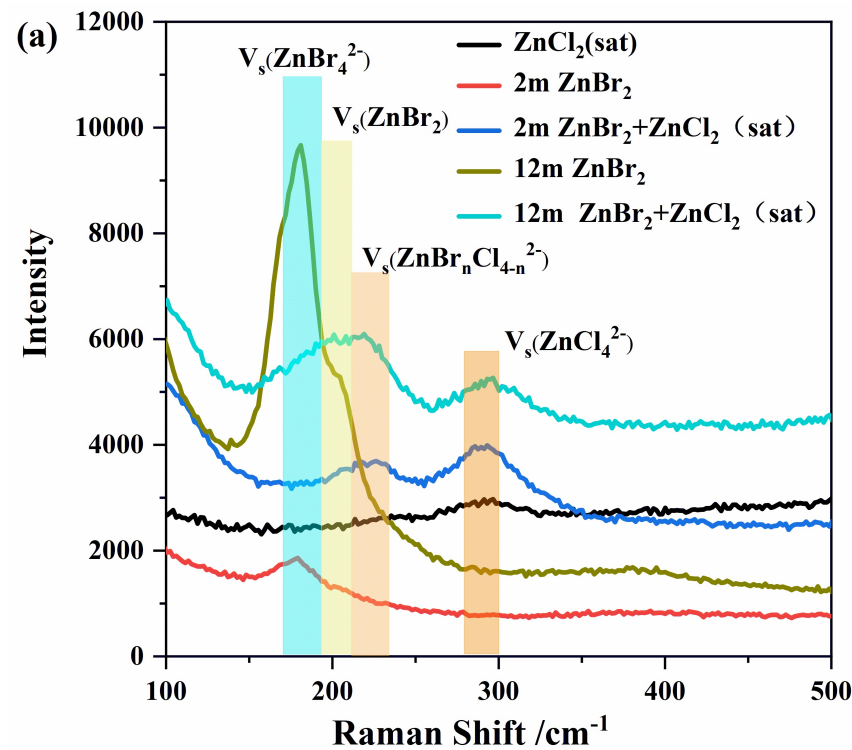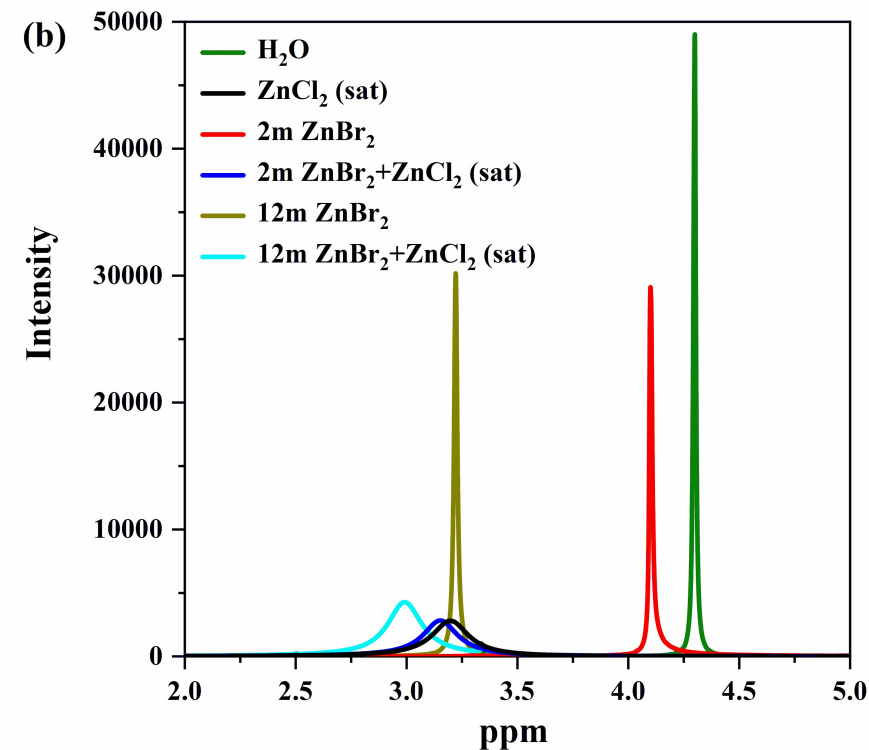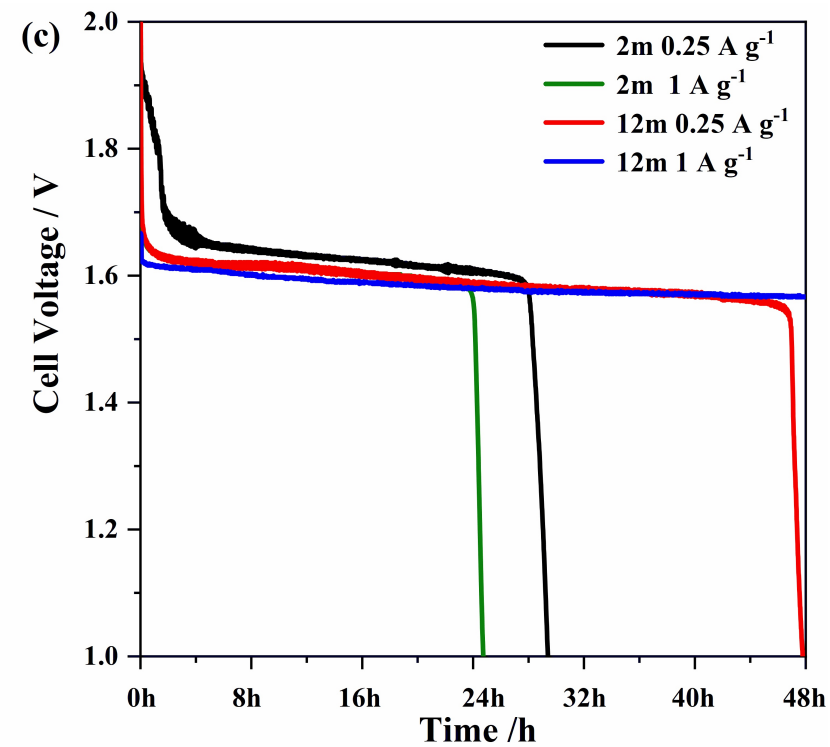

Supplement: d3cc04755e4.pdf [file d3cc04755e4.pdf]

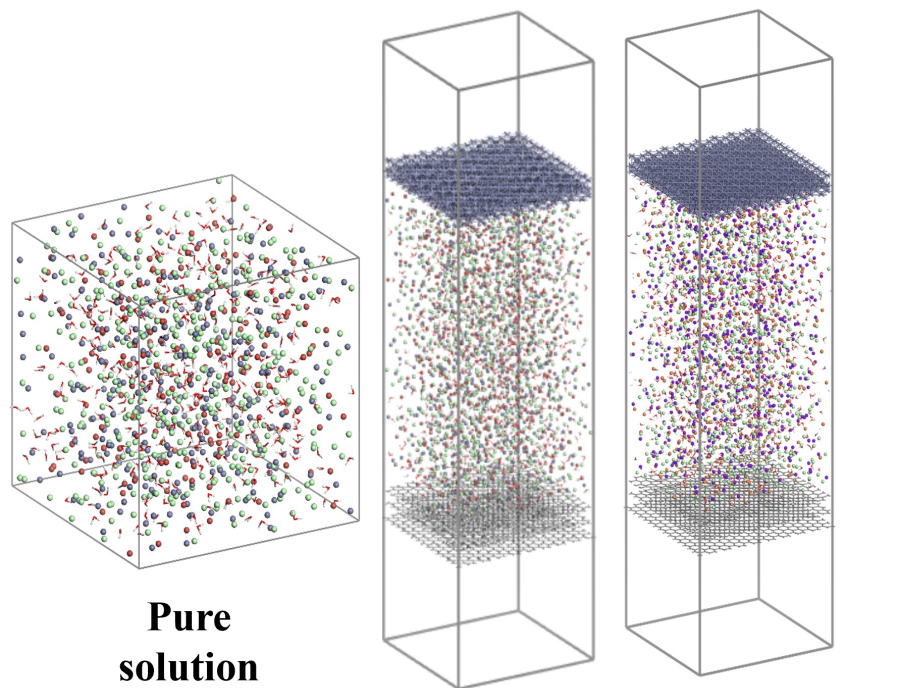

**Interaction energy:**

**-20.25 kcal mol<sup>-1</sup> nm<sup>-2</sup>**

**Interaction energy:**

**-5970.20 kcal mol<sup>-1</sup> nm<sup>-2</sup>**

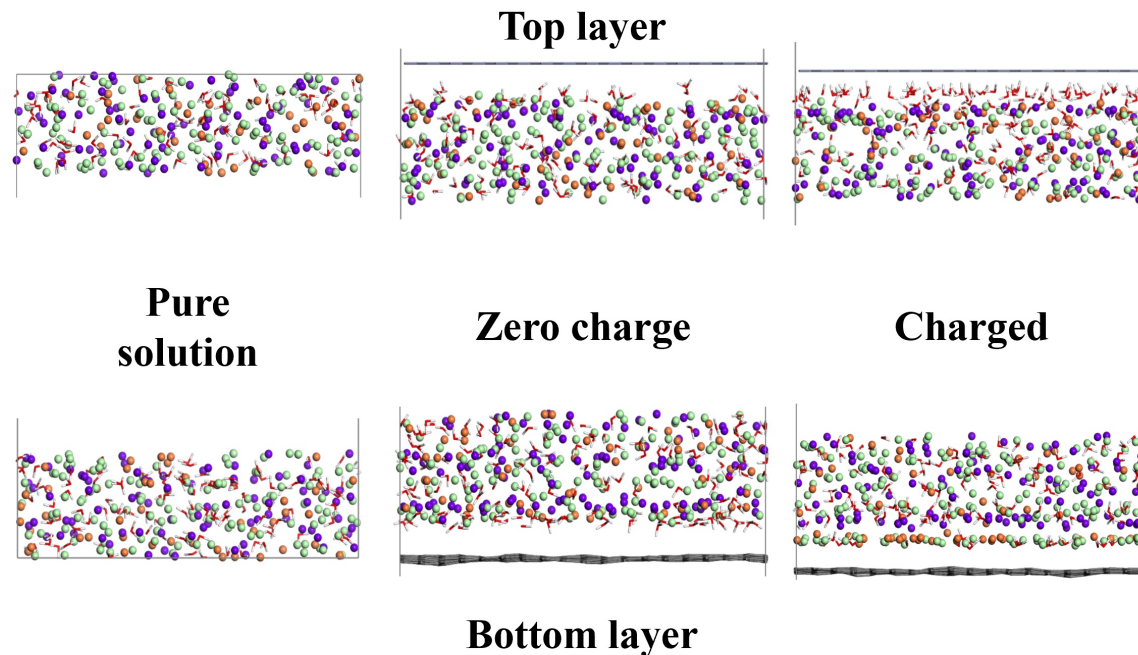

Supplement: d3cc04755e5.pdf [file d3cc04755e5.pdf]

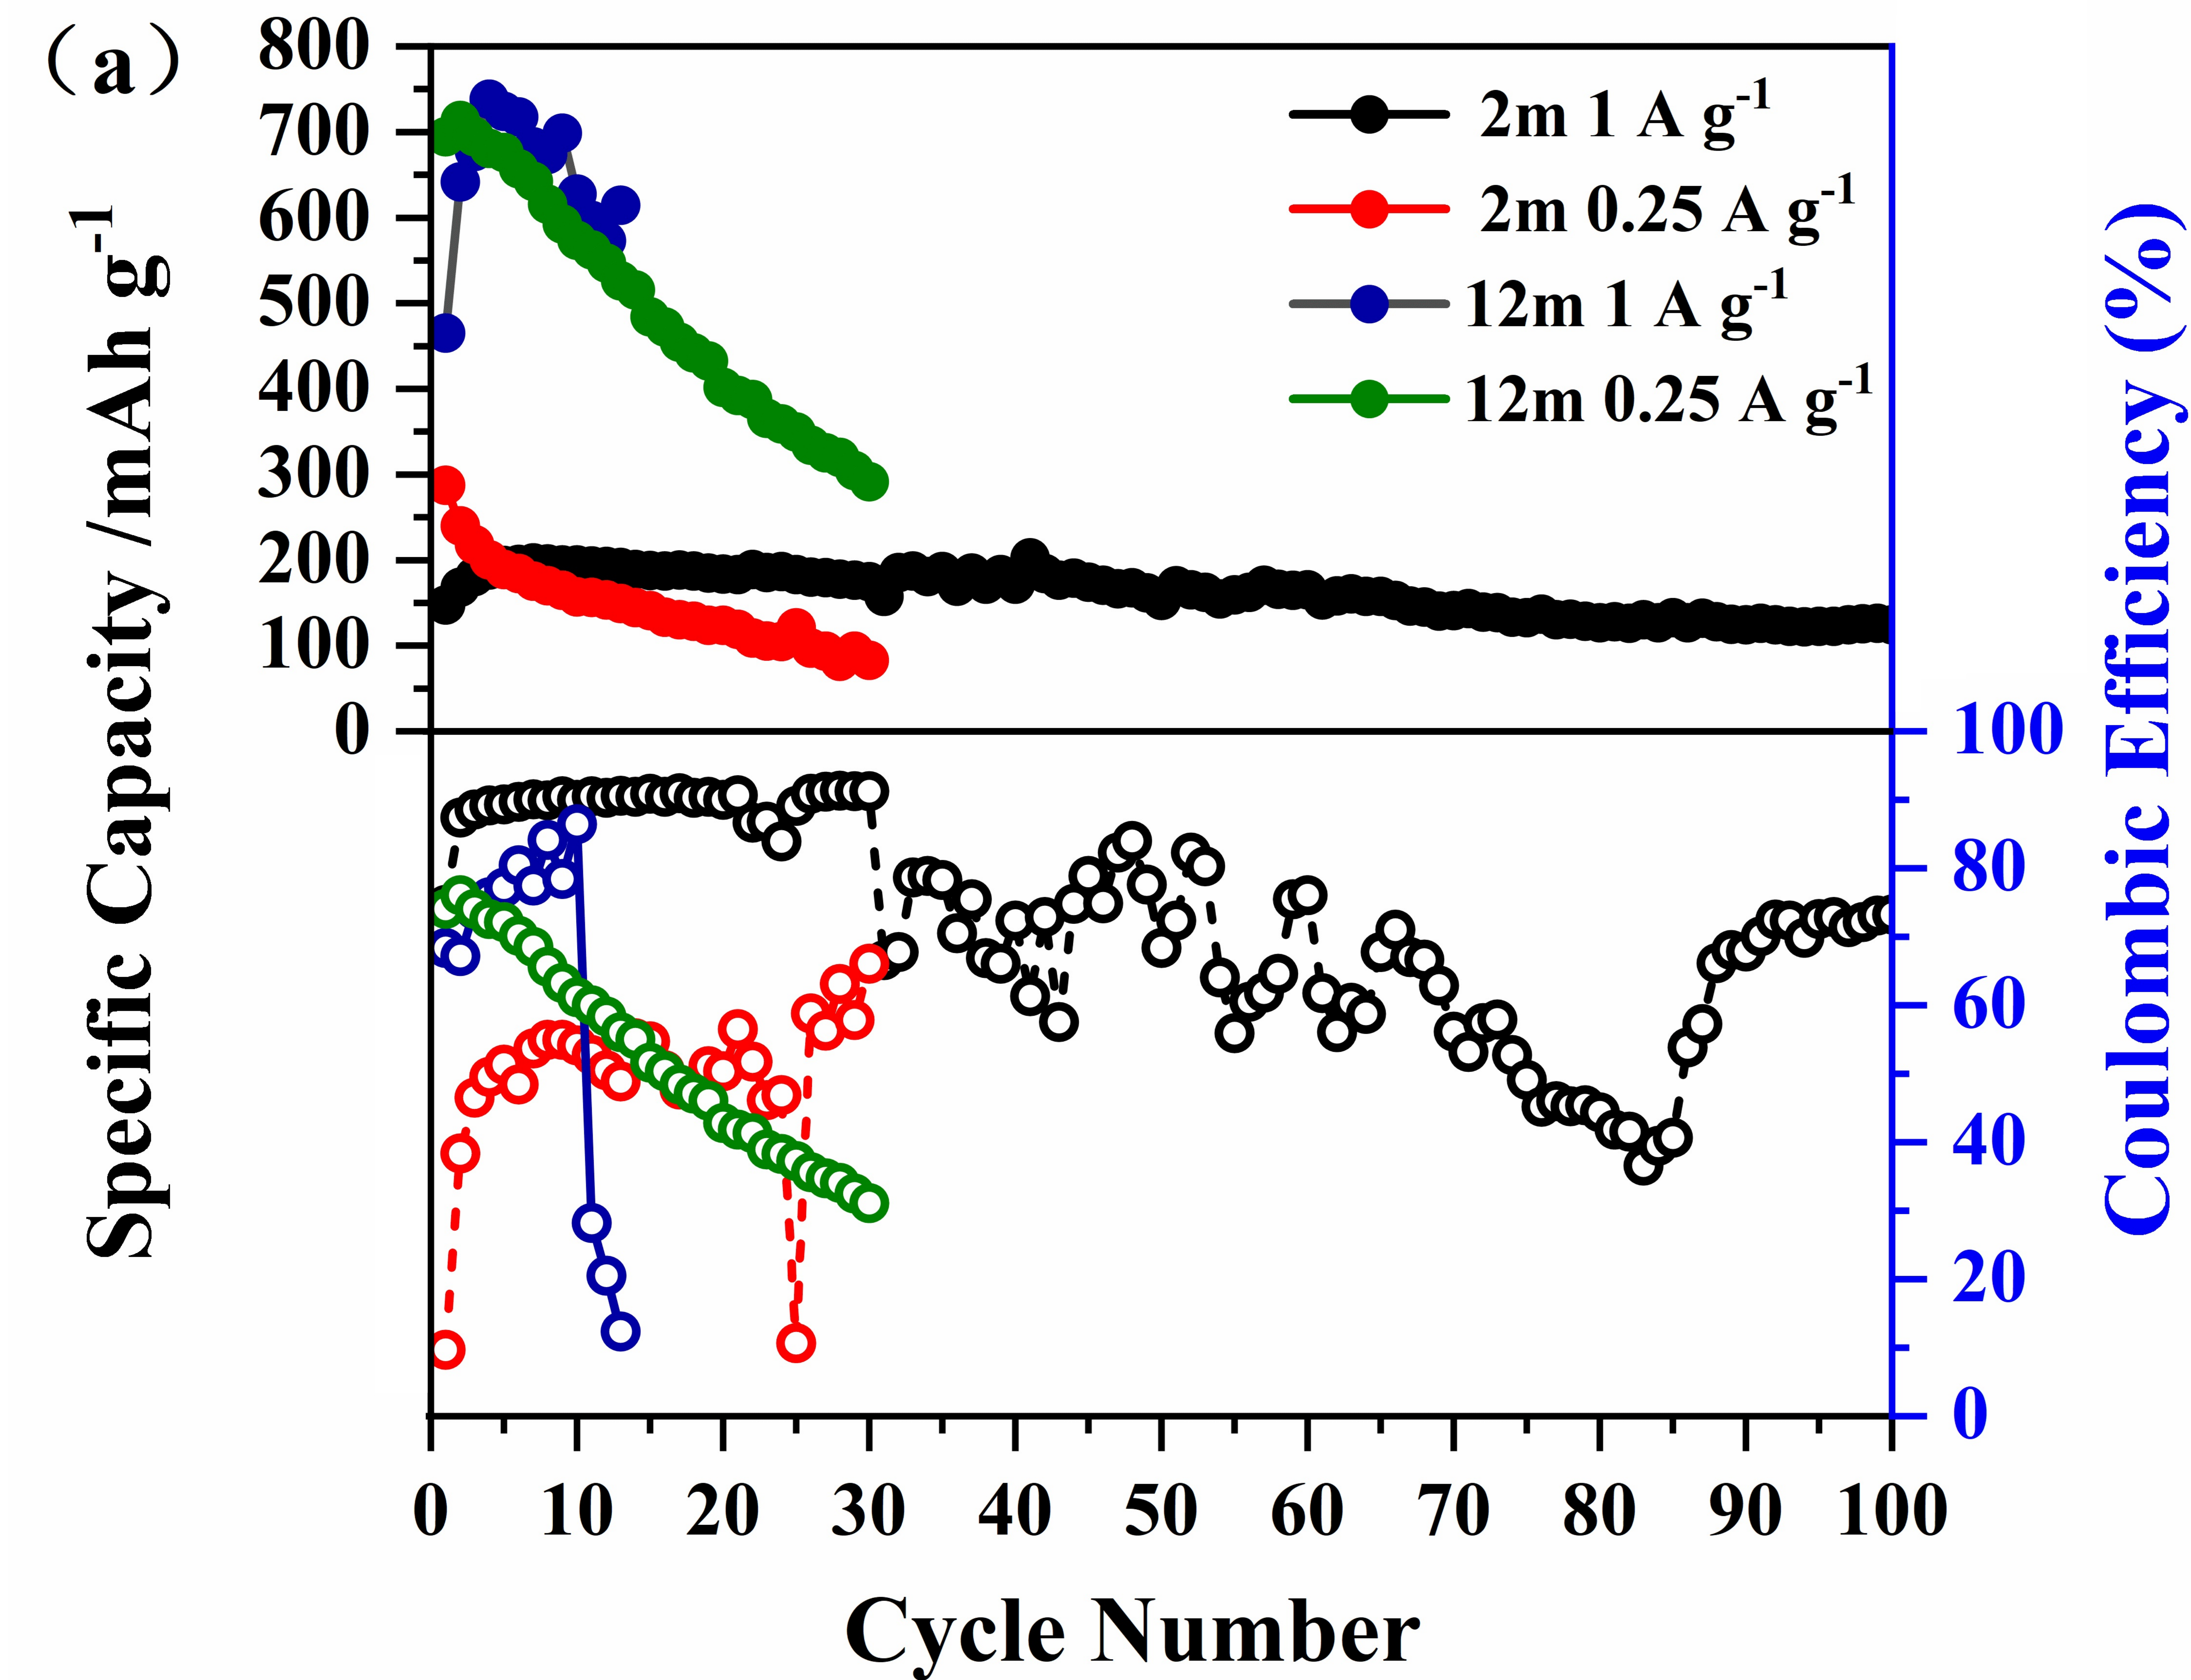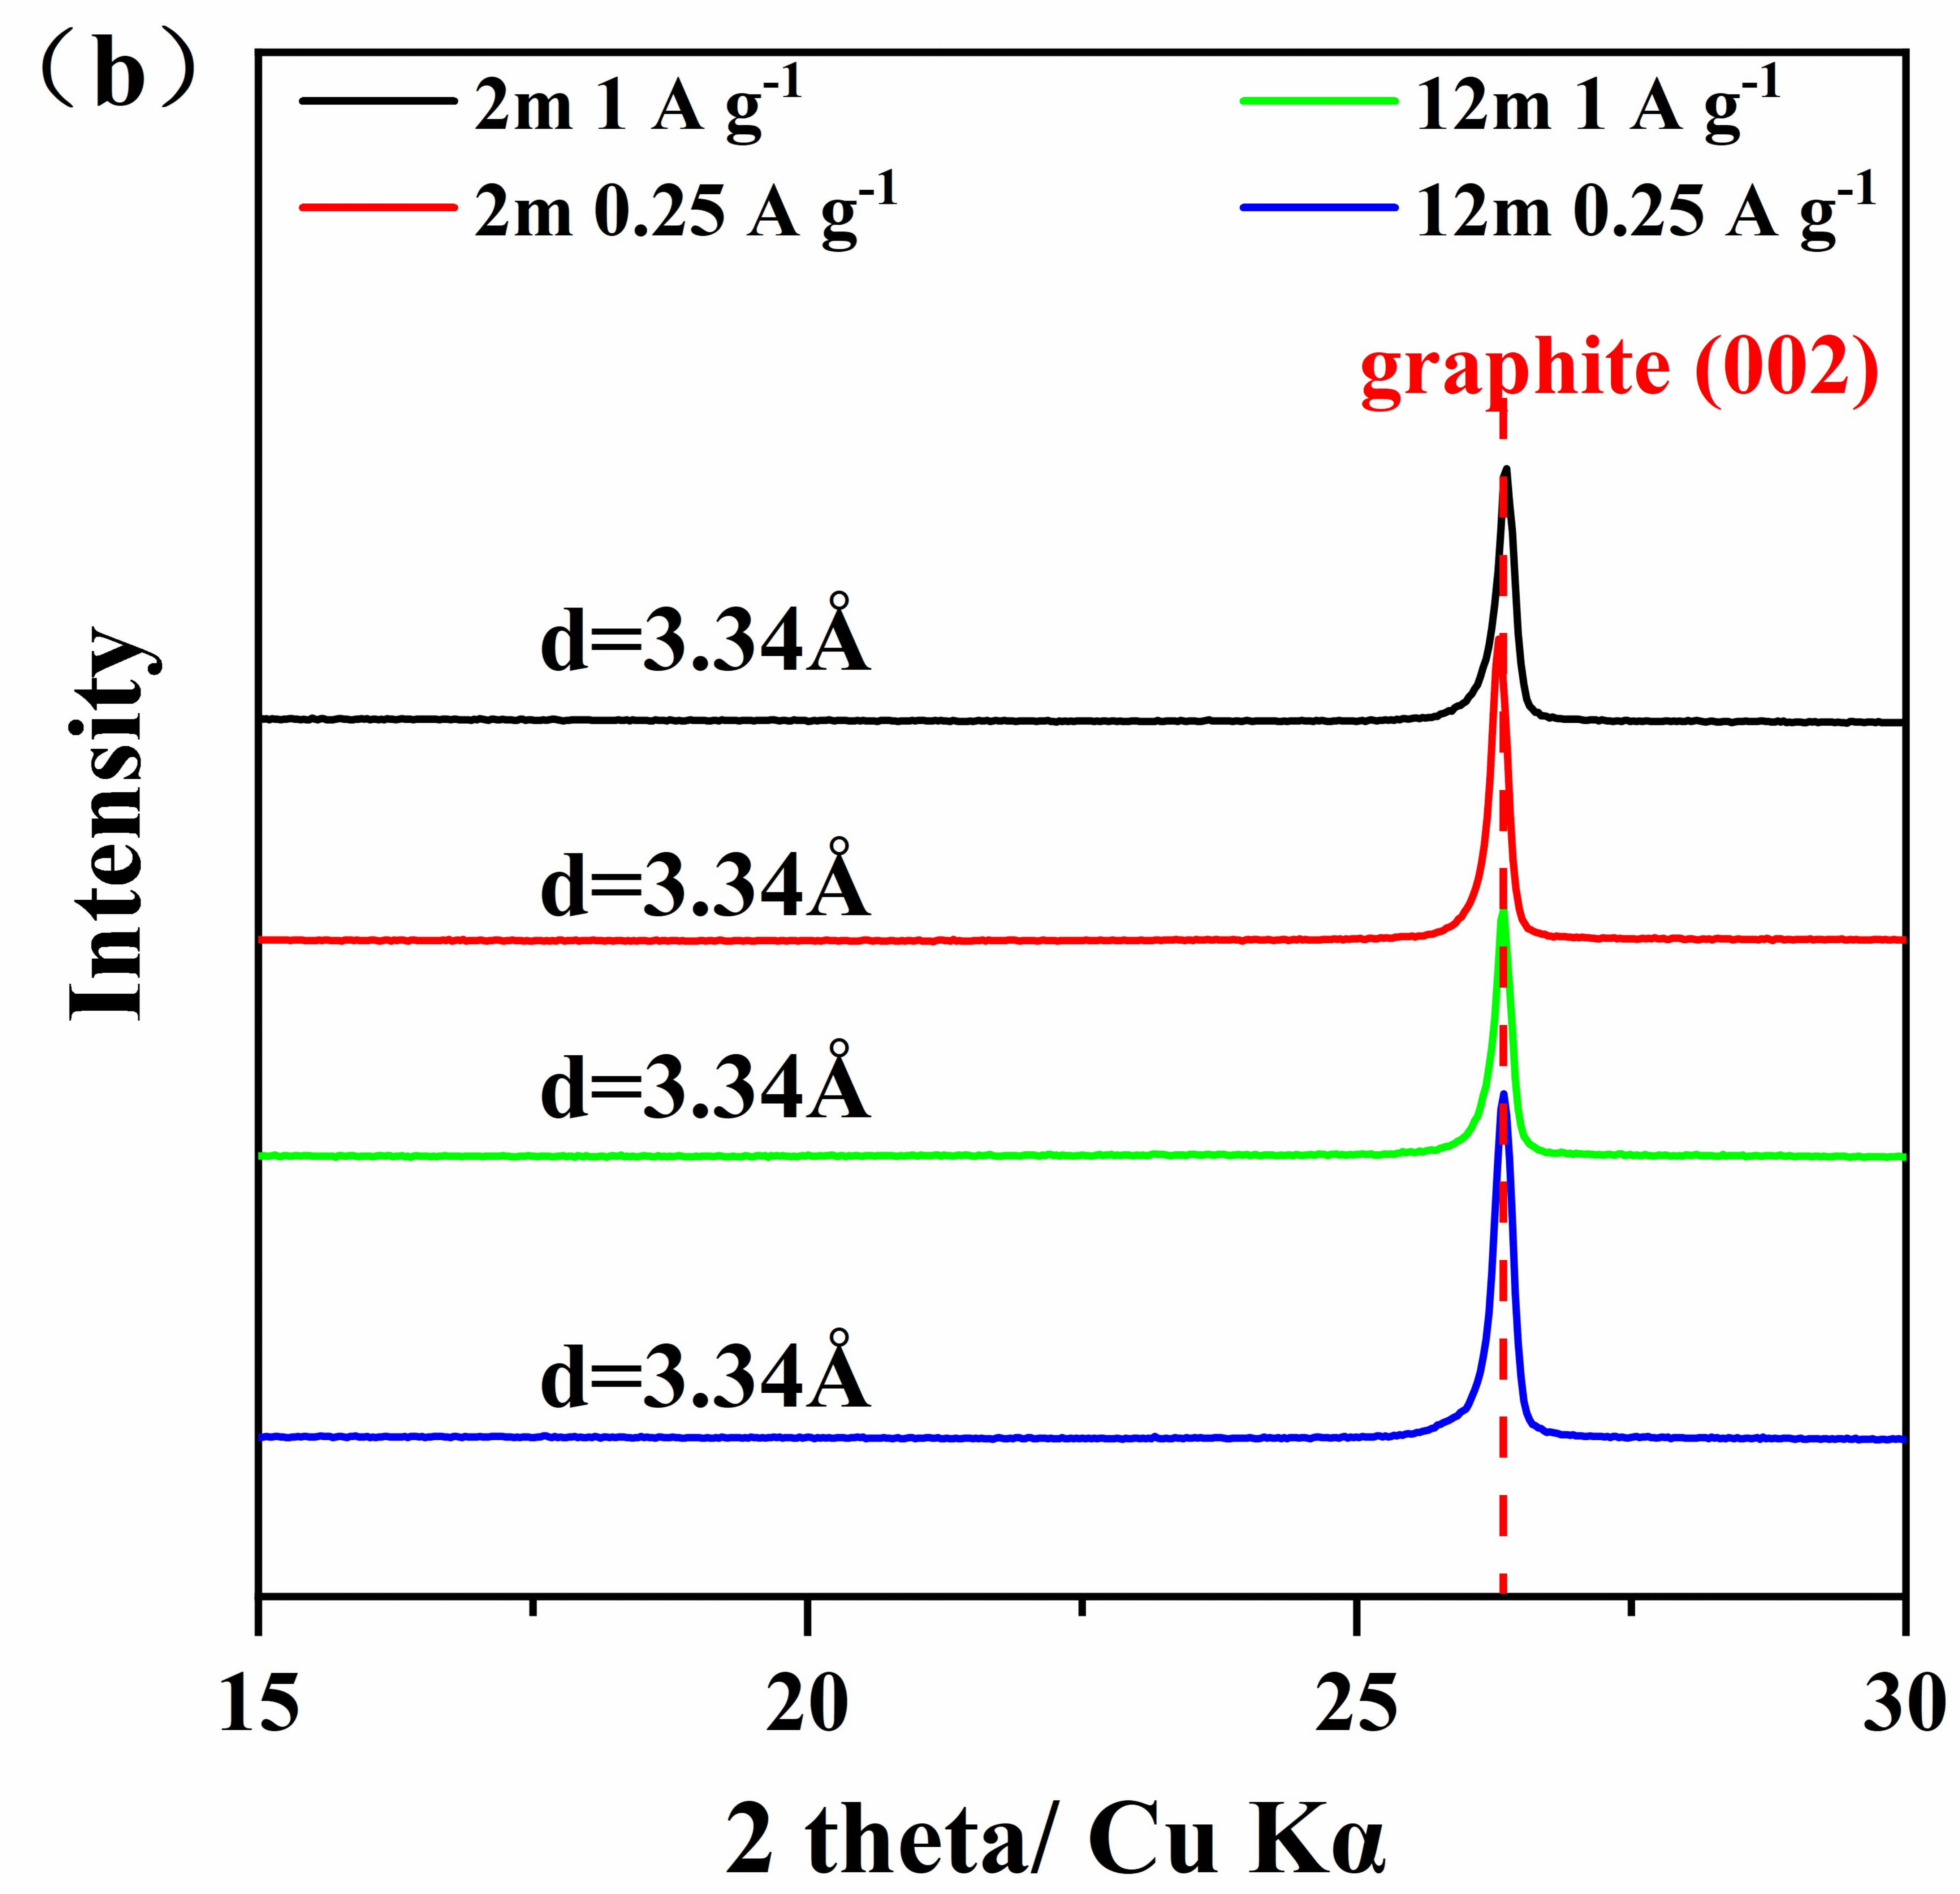

Supplement: d3cc04755e6.pdf [file d3cc04755e6.pdf]

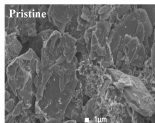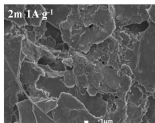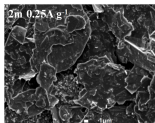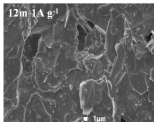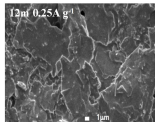

Supplement: d3cc04755e7.pdf [file d3cc04755e7.pdf]
